# Supplementary figures and images for: FgCsn12 Is Involved in the Regulation of Ascosporogenesis in the Wheat Scab Fungus Fusarium graminearum
Source: MDPI journal article supplement (doi:10.3390/ijms231810445), 2022-09-09

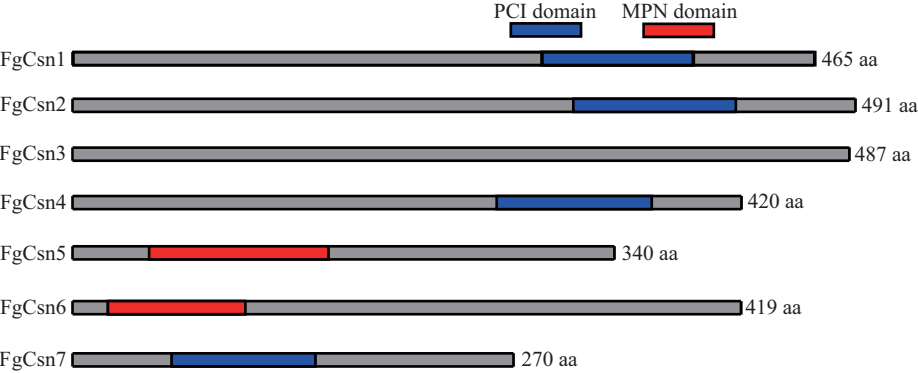

Supplement: s1 [file s1]
